# Supplementary material for: Collaboratively boosting charge transfer and CO2 chemisorption of SnO2 to selectively reduce CO2 to HCOOH
Source: Royal Society of Chemistry journal article supplement (doi:10.1039/d1cc01818c), 2021-01-01
Supplement: d1cc01818c1.pdf [file d1cc01818c1.pdf]

## Supplementary Information

### **Collaboratively boosting charge transfer and CO<sub>2</sub> chemisorption of SnO<sub>2</sub> to selectively reduce CO<sub>2</sub> to HCOOH**

*Yusheng Yuan, Kai Sheng, Guilin Zhuang, Qiuyan Li, Cong Dou, Qiao-jun Fang, Wen-wen Zhan,\* Hao Gao, Di Sun\* and Xiguang Han\**

#### **1. Experimental detail**

**1.1 Synthesis of Sn-MOF precursor.** SnSO<sub>4</sub> (0.105 g, 0.49 mmol) and terephthalic acid (0.12 g, 0.72 mmol) were mixed in the glass vial following by adding 6 mL DMF. Then, the mixture was transferred to a 25 mL Teflon-lined stainless steel autoclave and heated at 180 °C for 20 h. After slowly cooled to room temperature, colorless block shaped crystals were isolated by decanting the supernatant liquid and washed thoroughly with ethanol.

**1.2 Synthesis of SnO<sub>2</sub>-V<sub>2</sub>O<sub>5</sub>@N-C porous rods.** SnO<sub>2</sub>-V<sub>2</sub>O<sub>5</sub>@N-C PR were synthesized via calcination of the obtained Sn-MOFs precursor at 600 °C for 180 min in Ar atmosphere with heating rate of 2 °C·min<sup>-1</sup>.

**1.3 Synthesis of pure SnO<sub>2</sub> porous rods.** Pure SnO<sub>2</sub> were synthesized via calcination of the obtained SnO<sub>2</sub>-V<sub>2</sub>O<sub>5</sub>@N-C PR at 600 °C for 200 min in O<sub>2</sub> atmosphere with heating rate of 2 °C·min<sup>-1</sup>.

**1.4 Synthesis of SnO<sub>2</sub>-V<sub>2</sub>O<sub>5</sub> porous rods.** SnO<sub>2</sub>-V<sub>2</sub>O<sub>5</sub> porous rods were synthesized via the thermal treatment of Pure SnO<sub>2</sub> at 600 °C for 200 min under the vacuum atmosphere.

#### **1.5 Characterization**

The composition and phase of the as-prepared products were acquired by the powder X-ray diffraction (XRD) pattern using a Panalytical X-pert diffractometer with CuK $\alpha$  radiation. The morphology and crystal structure of as-prepared products were observed by scanning electron microscopy (SEM, SU8100), and high-resolution transmission electron microscopy (HRTEM, FEI Tecnai-F20) with an acceleration voltage of 200 kV. All TEM samples were prepared from depositing a drop of diluted suspensions in ethanol on a carbon film coated copper grid. PHI QUANTUM2000 photoelectron spectrometer (XPS) was used to characterize the surface compositions of product. The surface areas of these samples were measured by the Brunauer-Emmett-Teller (BET) method using nitrogen adsorption and desorption isotherms on a Micrometrics ASAP 2020 system. The element contents of C, N, and H in the sample were measured by Elementar Analyzer of Vario EL III.

## 1.6 Electrocatalytic reduction of CO<sub>2</sub>

6 mg of sample was dispersed in 0.5 mL of mixed solvent containing Nafion solution (5 wt%, 70  $\mu$ L), H<sub>2</sub>O (350  $\mu$ L), and ethanol (80  $\mu$ L) to form a homogeneous ink after at least 60 min ultrasonic treatment. Then 84  $\mu$ L of the catalyst ink was loaded onto a carbon paper (1 cm<sup>2</sup>). The catalyst loading was  $\approx 1$  mg $\cdot$ cm<sup>-2</sup>, and considering that SnO<sub>2</sub> is the mainly active sites, the amount of catalyst responsible for the reduction of CO<sub>2</sub> can be determined as about 0.78 mg $\cdot$ cm<sup>-2</sup>. Then, the electrodes were dried at 60 °C for 2 h before testing.

Electrochemical CO<sub>2</sub> reduction was performed in a gastight two-compartment electrochemical cell separated by a Nafion 117 membrane with a three-electrode setup, Pt mesh and SCE were used as the counter and reference electrodes. The reference electrode potentials were converted to RHE using the formula below, and the measured potentials (vs SCE) were converted to RHE using the formula  $E(\text{RHE}) = E(\text{SCE}) + 0.241 \text{ V} + 0.0591 \times \text{pH}$ . The electrolyte was 0.1 M potassium bicarbonate (KHCO<sub>3</sub>,  $\geq 99.95\%$ ) saturated with CO<sub>2</sub> (pH = 6.8). Before electrolysis, the electrolyte was purged with CO<sub>2</sub> gas (99.999%) for at least 30 min.

Each compartment contained 35 mL of electrolyte with a 20 mL headspace. The electrolyte in the cathodic compartment was stirred at a rate of 600 rpm to enhance mass transport of CO<sub>2</sub> and products around the surface of the working electrode. The CO<sub>2</sub> reduction was performed for 1 h at various potentials in the electrolyte. The electrochemical measurements were carried out using a potentiostat (CHI-760E). The current densities reported in this work were normalized to the geometric surface area. The electrochemical surface areas (ECSAs) was calculated according to the equation: ECSAs = R<sub>f</sub>S, where R<sub>f</sub> represented the roughness factor of the SnO<sub>2</sub>-based electrocatalyst and S represented the real surface area of working electrodes (S = 1 cm<sup>2</sup>). R<sub>f</sub> was estimated according to the relation  $R_f = C_{dl}/C_{dlref}$  based on the C<sub>dl</sub> of a smooth oxide surface (60 μF/cm<sup>2</sup> for C<sub>dlref</sub> of SnO<sub>2</sub>). The CO<sub>2</sub> electroreduction test was repeated three times and the results presented are the averaged values. All the experiments were conducted under ambient pressure and at room temperature (25 °C).

**CO<sub>2</sub>RR Products Analysis:** A gas chromatograph (GC9790 II, Fuli) with a thermal conductivity detector and a flame ionization detector was used to quantify the concentration of gaseous products including H<sub>2</sub> and CO. The concentration of reaction products in the liquid electrolyte was detected using a 500 MHz 1H liquid NMR spectrometer (Bruker Advance) with the water suppression method. N,N-dimethylformamide was used as an internal reference for the chemical shifts. Typically, NMR samples were prepared by mixing 100 μL of the product-containing electrolyte, 1 μL of N,N -dimethylformamide (≥99.9%,) and 599 μL D<sub>2</sub>O (99.9%). Formate calibration curves (Figure S3) were generated using a stock solution of sodium formate. Assuming that two electrons are needed to produce one formate molecule, the FE can be calculated as follows:  $FE = 2F \times n_{formate}/Q = 2F \times n_{formate}/(I \times t)$ , where F is the Faraday constant.

## 1.7 Density Functional Calculations

All of the density functional theory (DFT) calculations were performed by using Vienna ab-

initio Simulation Package (VASP). [1] The exchange-correlation energy was described with the generalized gradient approximation (GGA) and the Perdew-Burke-Ernzerhof (PBE). [2] Core electrons effect on the valence electron density were treated by using Projector Augmented Wave (PAW) method [3]. The cutoff energy for the plane wave basis sets was 400 eV. The convergence threshold of atoms position and cell parameters were set to be  $10^{-5}$  eV in energy and  $10^{-2}$  eV/Å in force. The DFT-D3 method was used to describe the van der Waals (vdW) interactions between different reaction molecules. [4] The Brillouin zone was sampled by k-points mesh of 1'1'1.

The Gibbs free energy calculation followed the work of Nørskov et al. [5] Under the standard reaction condition, the chemical potential of a proton and electron pair ( $\mu(H^+ + e^-)$ ) is equal to a half of gaseous hydrogen ( $\mu(H_2)$ ). For each elemental step, the Gibbs free energies ( $\Delta G$ ) was calculated by following equation:

$$\Delta G = \Delta E_{DFT} + \Delta ZPE + \Delta H - T\Delta S + \Delta G_{pH} \quad (1)$$

where  $E$  is the total energy calculated by VASP,  $ZPE$  is the zero point energy,  $H$ ,  $S$  are the heat capacity and entropy,  $T$  is equal to 298 K.  $G_{pH}$  is the influence caused by pH value.

Where  $n$  is the transferred electron number.

$$G_{pH} = -k_B T \ln(H^+) = pH \times k_B T \ln 10 \quad (2)$$

where  $k_B$  is the Boltzmann constant. All calculation presented here, pH is typically set as zero.

The adsorption energies ( $E_{ads}$ ) of the different adsorbates was calculated by the expression:

$$E_{ads} = E_{total} - (E_{catal} + E_{mol}) \quad (3)$$

where  $E_{total}$  shows the total energy of slab after adsorption,  $E_{catal}$  is the energies of bare catalyst, and the  $E_{mol}$  denotes the total energies of an adsorbate molecule including the  $CO_2$ ,  $COOH$ ,  $HCOOH$ ,  $CO$ .



## 2. Experimental results

**Figure S1** (a) The XRD pattern of Sn-MOF precursor. (b) FE-SEM images of Sn-MOF precursor.

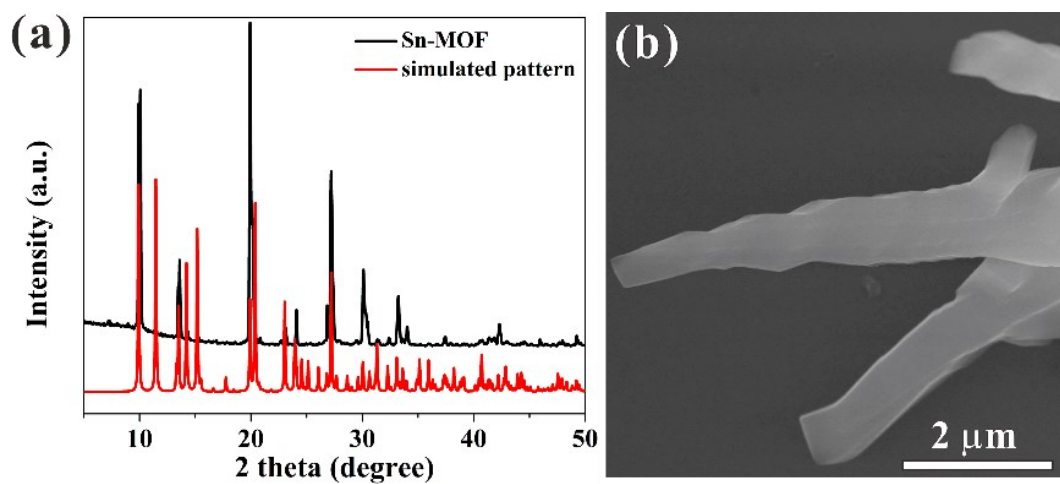

**Figure S2** (a) SEM image of Sn-MOF precursor, (b-f) Element mapping of Sn-MOF precursor.

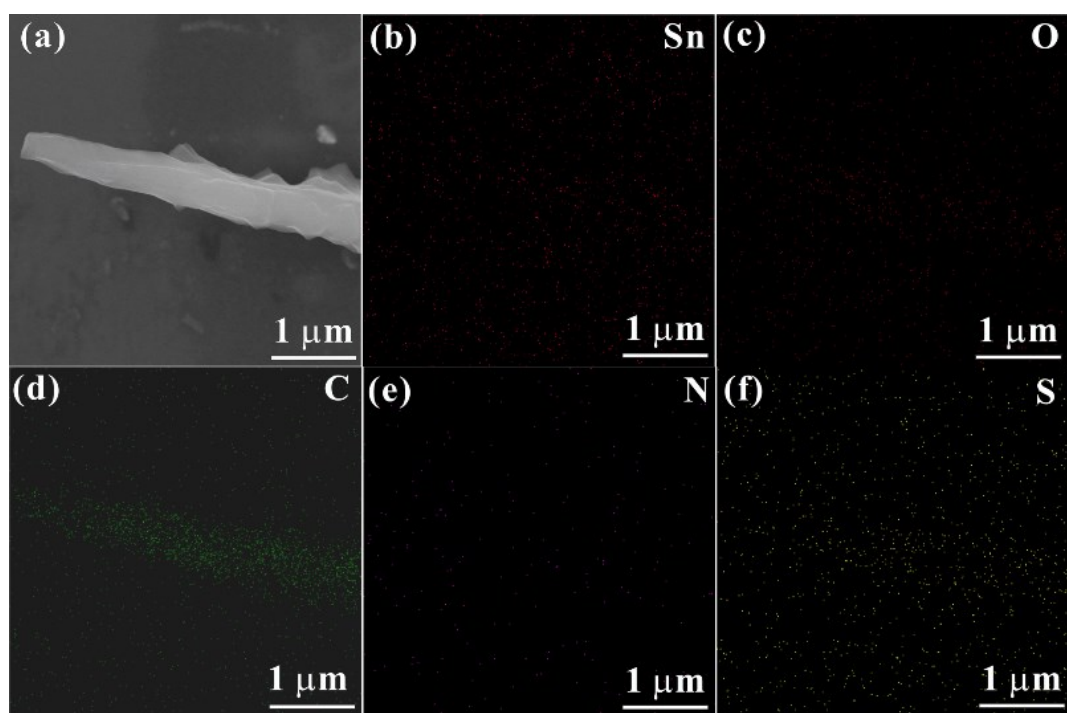

**Figure S3** TGA of Sn-MOF precursor.

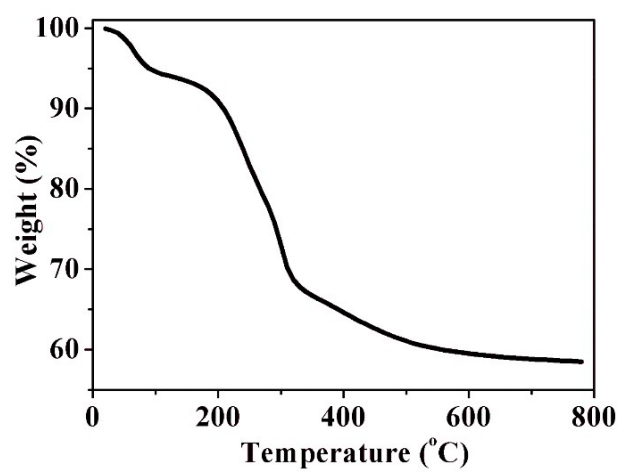

**Figure S4** N<sub>2</sub> adsorption/desorption isotherms of SnO<sub>2</sub>-V<sub>2</sub>O<sub>5</sub>@N-C PR.

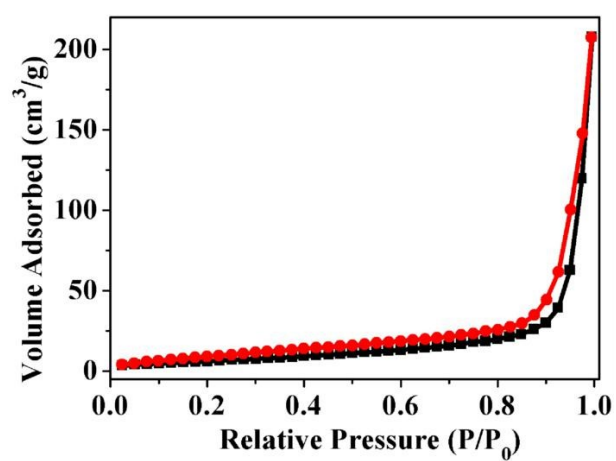

**Table S1.** Mass content and atomic content of the various elements in SnO<sub>2</sub>-V<sub>2</sub>O<sub>5</sub>@N-C.

| <b>Element</b>            | <b>N</b> | <b>C</b> | <b>H</b> | <b>Sn</b> | <b>O</b> |
|---------------------------|----------|----------|----------|-----------|----------|
| <b>Mass content (%)</b>   | 0.327    | 10.37    | 0.553    | 61.70     | 26.90    |
| <b>Atomic content (%)</b> | 0.6      | 23.7     | 15.2     | 14.3      | 46.2     |

The mass contents of C, N, and H in SnO<sub>2</sub>-V<sub>2</sub>O<sub>5</sub>@N-C were firstly measured by Elementar Analyzer of Vario EL III. Then combined with the XPS result of O 1s, the mass content of Sn and O was calculated as 61.70% and 26.90%. Finally, the atomic contents of these elements were calculated and listed in the above Table.

**Figure S5** (a) The XPS survey spectrum of SnO<sub>2</sub>-V<sub>O</sub>@N-C PR. (b) The high-resolution O 1s spectrum of SnO<sub>2</sub>-V<sub>O</sub>@N-C PR.

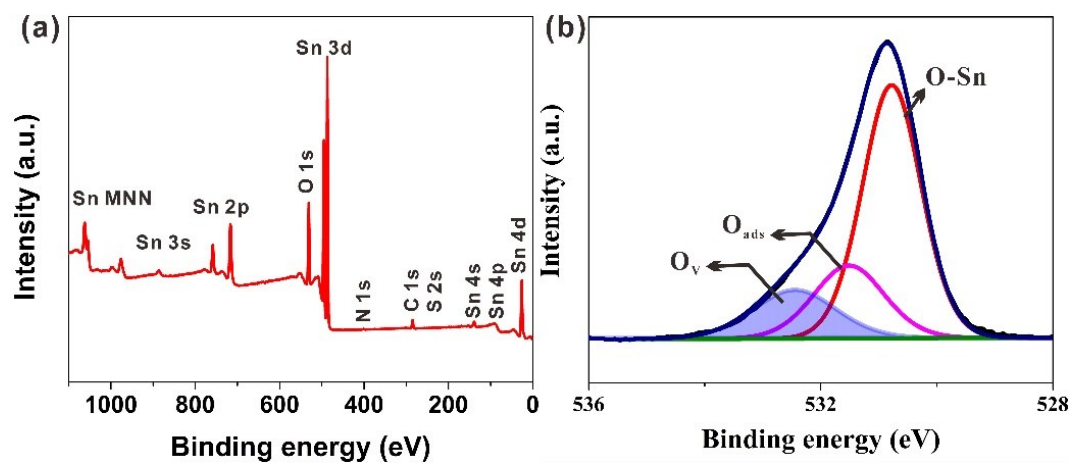

**Figure S6** (a) The XRD pattern of pure SnO<sub>2</sub> PR. (b) The typical SEM image of pure SnO<sub>2</sub> PR. (c) and (d) The corresponding elemental mapping profiles.

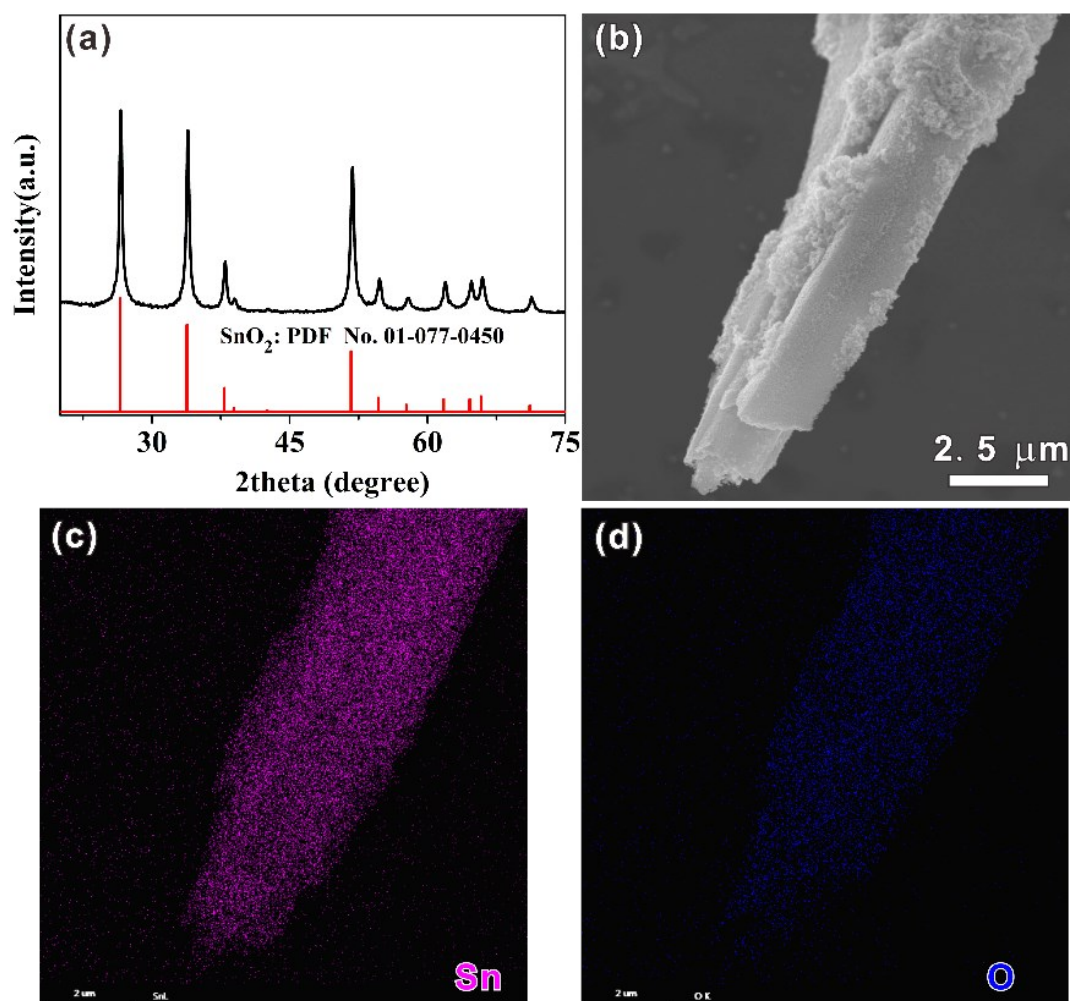

**Figure S7** The high-resolution O 1s spectrum of pure SnO<sub>2</sub> PR.

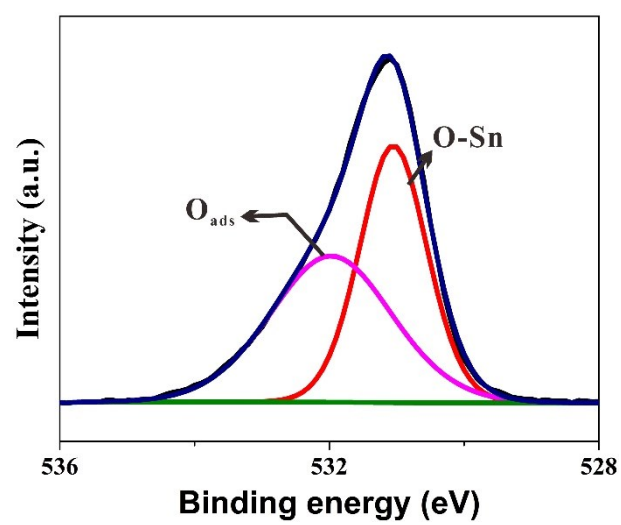

**Figure S8** (a) LSV curves, (b) partial current density for HCOOH, and (c) FE of HCOOH over  $\text{SnO}_2\text{-V}_\text{O}@\text{N-C}$  with different concentration of  $\text{KHCO}_3$  as the electrolyte.

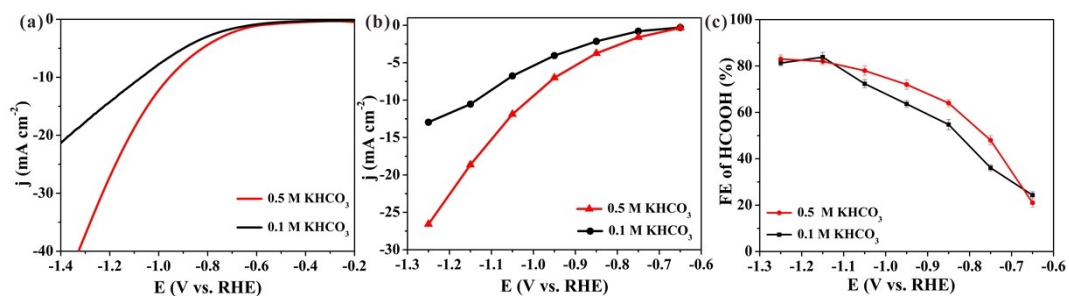

**Figure S9** LSV curves of  $\text{SnO}_2\text{-V}_\text{O}@\text{N-C}$  in  $\text{CO}_2$ -saturated solution (red line) and  $\text{N}_2$ -saturated solution (black line) and blank experiment (black carbon, blue line).

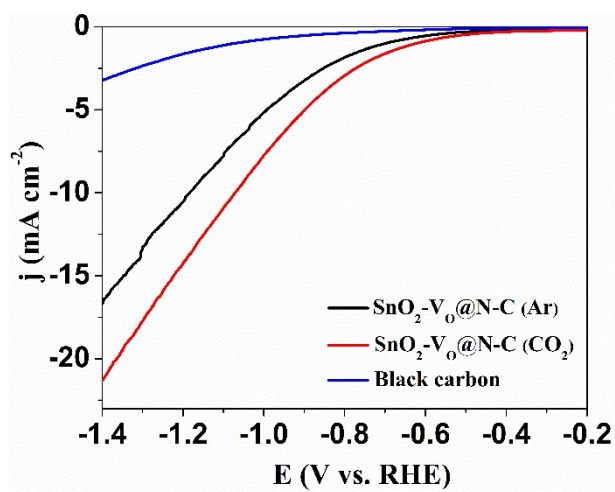

**Figure S10** (a) EPR spectra of  $\text{SnO}_2\text{-V}_\text{O}@\text{N-C}$ ,  $\text{SnO}_2\text{-V}_\text{O}$  and pure  $\text{SnO}_2$ . (b) The high-resolution O 1s spectrum of  $\text{SnO}_2\text{-V}_\text{O}$  PR.

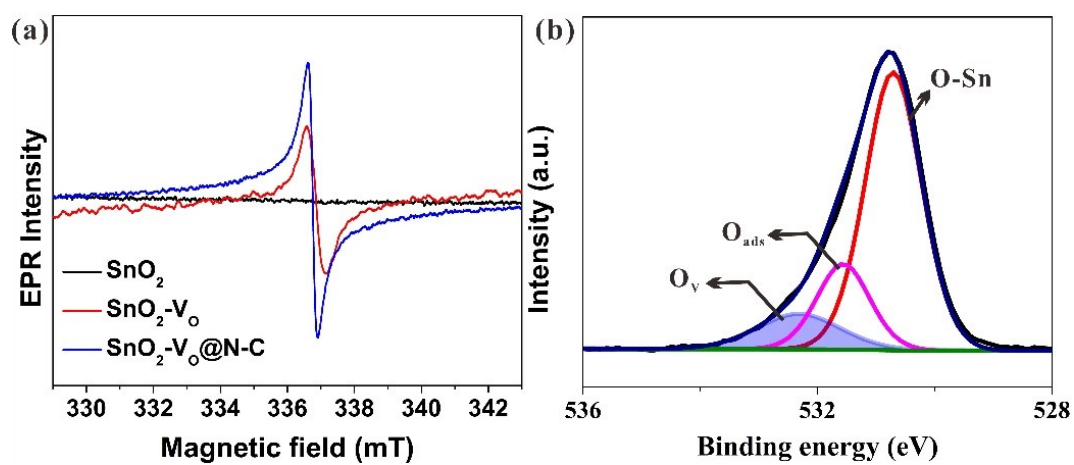

**Figure S11** Gas chromatograph identification of standard gas with (a) TCD and (b) FID.

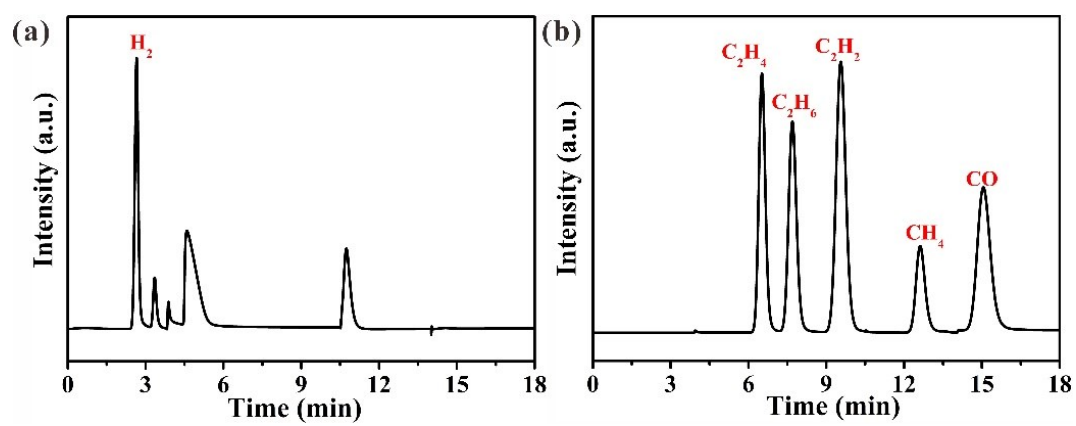

**Figure S12** Gas chromatograph identification of  $\text{H}_2$  and  $\text{CO}$  production for  $\text{CO}_2$  reduction reaction over  $\text{SnO}_2\text{-V}_\text{O}@\text{N-C}$ .

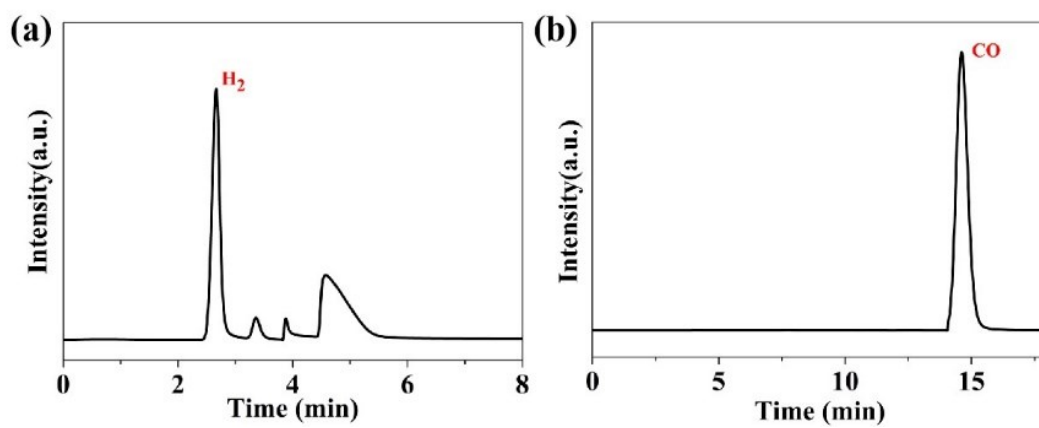

**Figure S13** (a) Linear relationship between the formate concentration and relative peak area vs. DMF. (b) NMR spectrum of 0.1 MKHCO<sub>3</sub>; electrolyte after 1 h of CO<sub>2</sub>RR at -1.15 V.

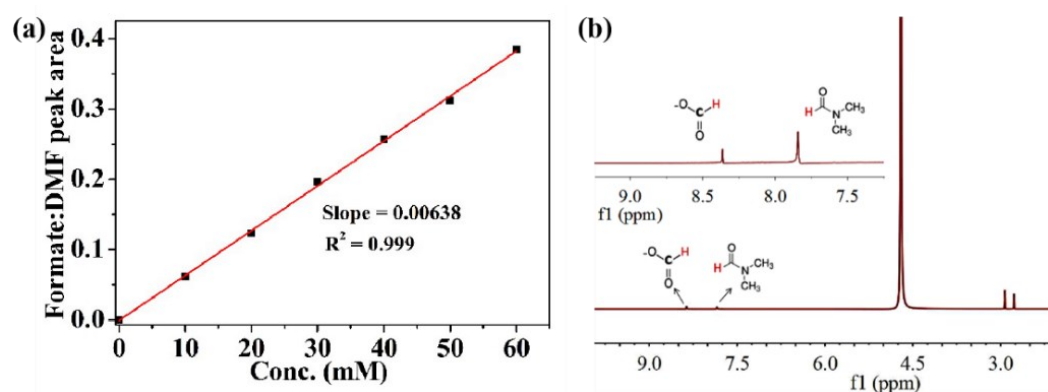

**Table S2** The summary table of catalyst performance in the field of CO<sub>2</sub>RR.

| Electrode Materials                                  | Electrolyte             | Potential<br>(V vs. RHE) | FE <sub>formate</sub><br>(%) | References                                            |
|------------------------------------------------------|-------------------------|--------------------------|------------------------------|-------------------------------------------------------|
| SnO <sub>2</sub> -V <sub>2</sub> O <sub>5</sub> @N-C | 0.1 M KHCO <sub>3</sub> | -1.15                    | 83.8                         | This work                                             |
| SnO <sub>2</sub> -V <sub>2</sub> O <sub>5</sub>      | 0.1 M KHCO <sub>3</sub> | -1.15                    | 67.8                         | This work                                             |
| SnO <sub>2</sub>                                     | 0.1 M KHCO <sub>3</sub> | -1.25                    | 58.3                         | This work                                             |
| Surface-engineered Sn foil                           | 0.1 M KHCO <sub>3</sub> | -1.09                    | 77.4                         | <i>Catal. Sci. Technol.</i> , 2017, 7, 2542.          |
| Sn dendrite/Sn foil                                  | 0.1 M KHCO <sub>3</sub> | -1.36                    | 71.6                         | <i>ChemSusChem</i> , 2015, 8, 3092.                   |
| Sn quantum sheets confined in graphene               | 0.1 M KHCO <sub>3</sub> | -1.26                    | 89                           | <i>Nat. Commun.</i> 2016, 7, 12697.                   |
| SnO <sub>2</sub> /carbon black                       | 0.1 M KHCO <sub>3</sub> | -1.26                    | 86.2                         | <i>J. Am. Chem. Soc.</i> 2014, 136, 1734-1737.        |
| Sn(S)/Au needle                                      | 0.1 M KHCO <sub>3</sub> | -0.75                    | 95                           | <i>Joule</i> , 2017, 1, 794.                          |
| SnO <sub>2</sub> GDE                                 | 0.1 M KHCO <sub>3</sub> | -1.27                    | 68                           | <i>ECS Trans.</i> 2015, 66, 53-59.                    |
| Sn foil                                              | 0.1 M KHCO <sub>3</sub> | -0.95                    | 69.5                         | <i>Int. J. Hydrogen Energ.</i> 2014, 39, 16506-16512. |
| Sn/SnO <sub>2</sub> /Ti                              | 0.1 M KHCO <sub>3</sub> | -0.70                    | 40                           | <i>J. Am. Chem. Soc.</i> 2012, 134, 1986-1989.        |

**Figure S14** (a) The FE for HCOOH of SnO<sub>2</sub>-V<sub>0</sub>@N-C in the five-cycle testing. (b) The long-term stability performance of SnO<sub>2</sub>-V<sub>0</sub>@N-C conducted in the potential of -1.15 V.

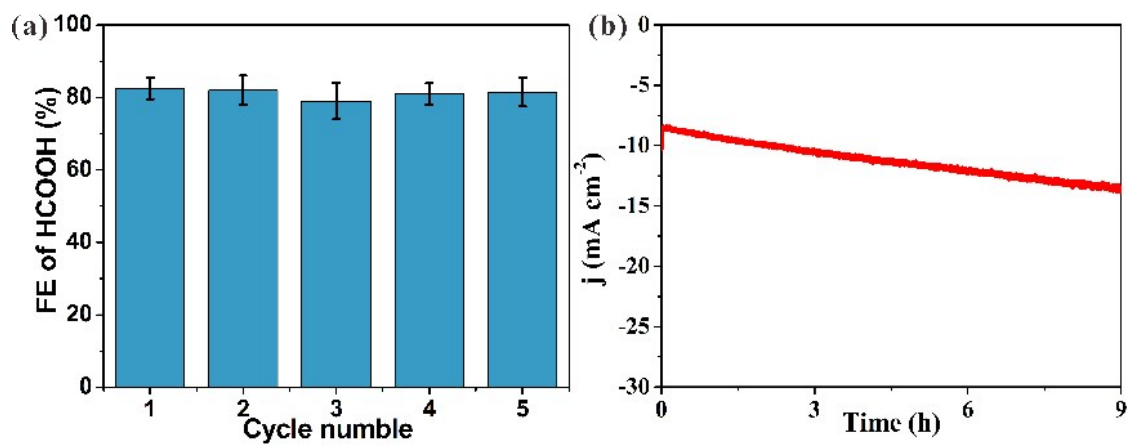

**Figure S15** (a) The typical SEM image, (b) TEM image, and (c) the HRTEM image of  $\text{SnO}_2\text{-V}_\text{O}@\text{N-C}$  after electrocatalytic process. (d) The high-resolution Sn 3d spectra of  $\text{SnO}_2\text{-V}_\text{O}@\text{N-C}$  before and after the electrocatalytic process. (e) The high-resolution O 1s spectrum of  $\text{SnO}_2\text{-V}_\text{O}@\text{N-C}$  after the electrocatalytic process. (f) The high-resolution C 1s spectrum of  $\text{SnO}_2\text{-V}_\text{O}@\text{N-C}$  after the electrocatalytic process.

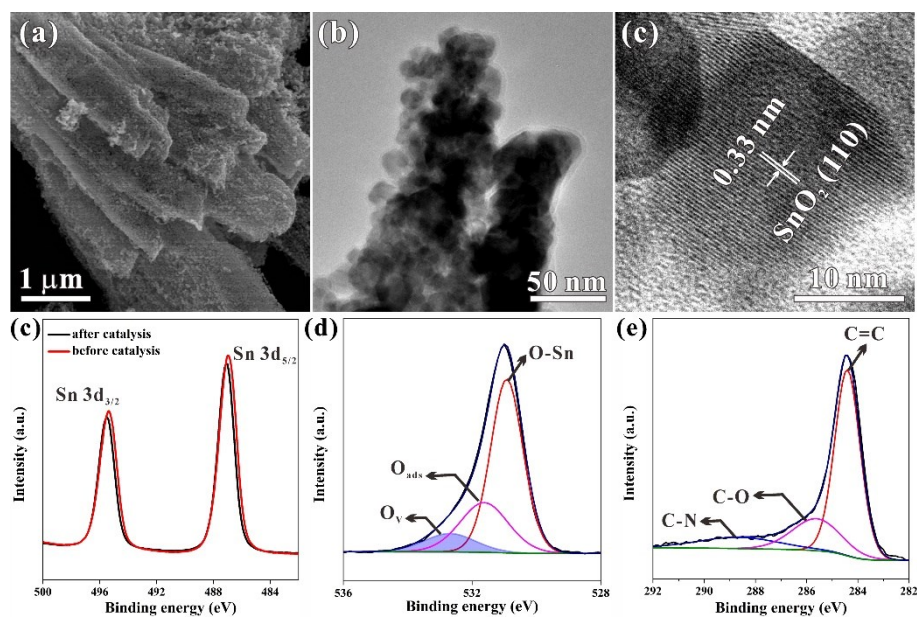

**Figure S16** The comparison in the TON for the CO<sub>2</sub>RR to HCOOH over the three samples.

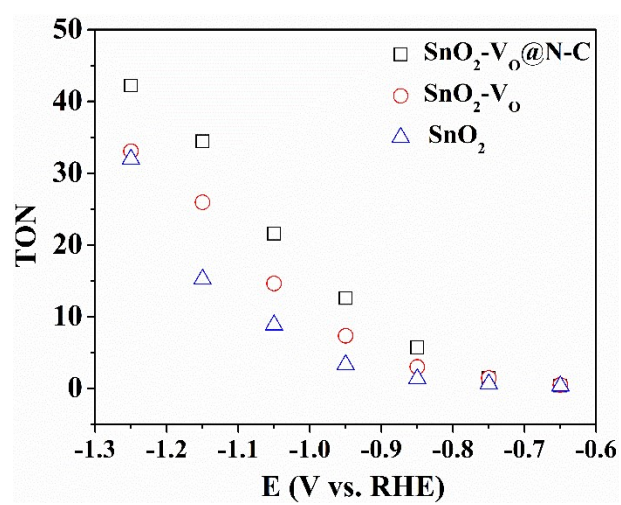

**Figure S17** The FE for H<sub>2</sub> over the three electrocatalysts.

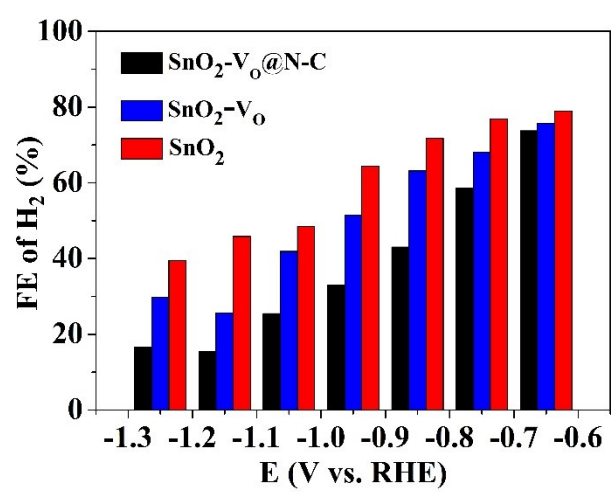

**Figure S18** Cyclic voltammograms recorded in the non-faradaic capacitance current range at increasing scan rates: (a)  $\text{SnO}_2\text{-V}_\text{O}@\text{N-C}$ , (b)  $\text{SnO}_2\text{-V}_\text{O}$ , (c)  $\text{SnO}_2$ .

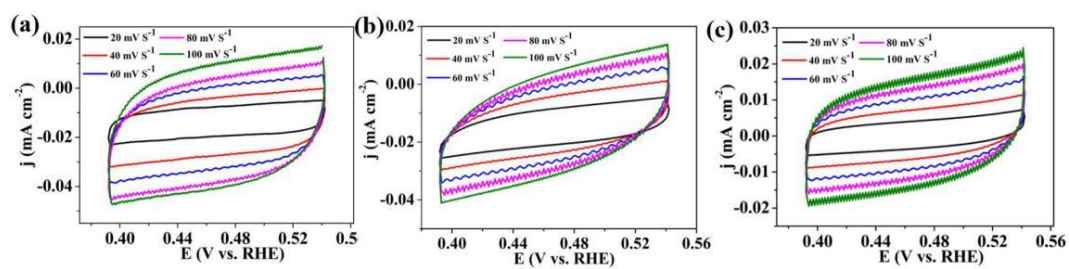

**Figure S19** Partial current density for HCOOH corrected by ECSA over the three samples as electrocatalysts.

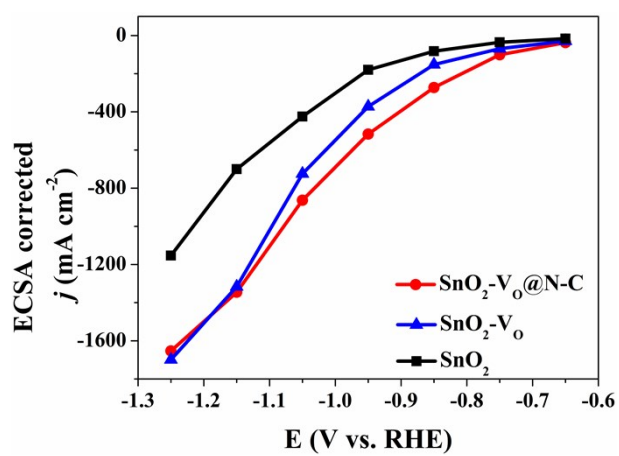

**Table S3** The fitting parameters of SnO<sub>2</sub>-V<sub>O</sub>@N-C, SnO<sub>2</sub>-V<sub>O</sub> and SnO<sub>2</sub>.

| <b>Sample</b>                            | <b>R1 (Rs)</b> | <b>R2 (Rct)</b> |
|------------------------------------------|----------------|-----------------|
| <b>SnO<sub>2</sub>-V<sub>O</sub>@N-C</b> | 6.78           | 17.55           |
| <b>SnO<sub>2</sub>-V<sub>O</sub></b>     | 7.09           | 19.85           |
| <b>SnO<sub>2</sub></b>                   | 6.91           | 21.65           |

**Figure S20** The Optimized structures of (a)  $\text{SnO}_2$  (101); (b) N-C; (c)  $\text{SnO}_2@\text{N-C}$ ; (d)  $\text{SnO}_2\text{-Vo@N-C}$ . The O vacancy was generated by missing the circled O in (c).

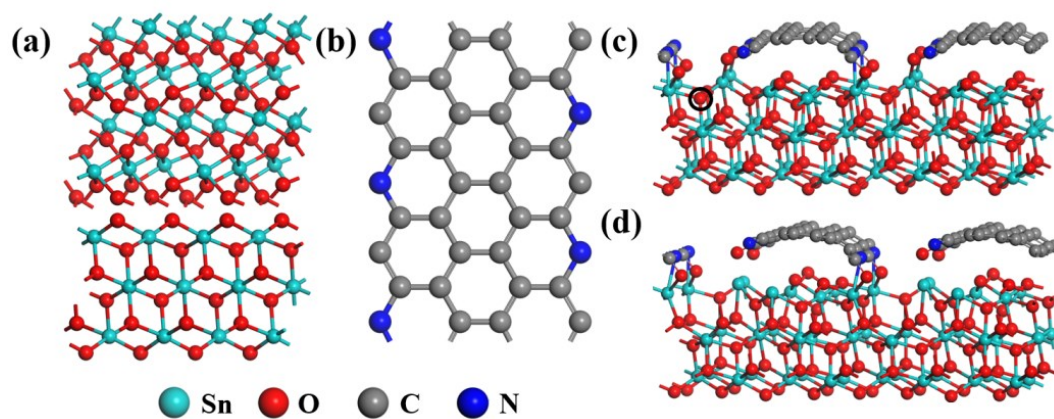

**Figure S21** (a) The adsorption configuration of CO<sub>2</sub> of SnO<sub>2</sub>@N-C. (b) The partial density of states of CO<sub>2</sub> gas adsorbed on SnO<sub>2</sub>@N-C.

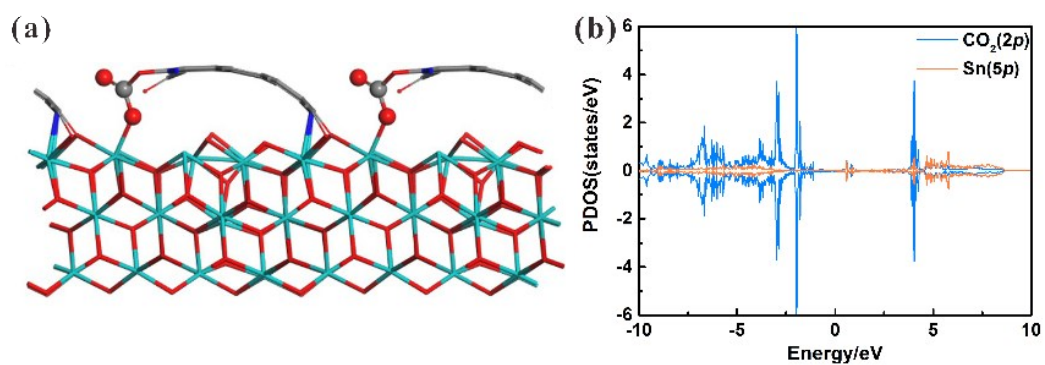

**Reference:**

- [1] G. Kresse, J. F. l., Efficient iterative schemes for ab initio total-energy calculations using a plane-wave basis set. *Phys. Rev. B.* 1996, 54, 11169-11186.
- [2] J. P. Perdew, K. B., Matthias Ernzerhof, Generalized Gradient Approximation Made Simple. *Phys. Rev. Lett.* 1996, 77, 3865-3868.
- [3] G. Kresse, D. J., From ultrasoft pseudopotentials to the projector augmented-wave method. *Phys. Rev. B.* 1999, 59, 1758-1775.
- [4] Grimme, S.; Antony, J.; Ehrlich, S.; Krieg, H., A consistent and accurate ab initio parametrization of density functional dispersion correction (DFT-D) for the 94 elements H-Pu. *J. Chem. Phys.* 2010, 132, 154104.
- [5] J. K. Nørskov, J. R., A. Logadottir, and L. Lindqvist, Origin of the Overpotential for Oxygen Reduction at a Fuel-Cell Cathode. *J. Phys. Chem. B.* 2004, 108, 17886-17892.
